# Supplementary material for: Multiscale Modelling and Mechanical Anisotropy of Periodic Cellular Solids with Rigid-Jointed Truss-Like Microscopic Architecture
Source: MDPI journal article supplement (doi:10.3390/applmech2020020), 2021-06-01
Supplement: s1 [file s1]

# Supplementary Materials:

## Multiscale Modelling and Mechanical Anisotropy of Periodic Cellular Solids with Rigid-Jointed Truss-Like Microscopic Architecture

Victor E.L. Gasparetto and Mostafa S.A. ElSayed\*

*Department of Mechanical and Aerospace Engineering, Carleton University, Ottawa, ON, K1S 5B6, CANADA*

### S.1.: Elastic Properties of Rigid Jointed 2D Lattice Materials

The elastic mechanical properties are presented herein for all 13 lattice topologies considered in the study. The following equations were utilized to create all charts presented in the paper. For all equations,  $H$  and  $L$  are, respectively, the in-plane thickness and the length of a reference cell element.  $\bar{\rho}_L$  is the relative density of the lattice material,  $\bar{K}_L$  is the homogenized stiffness matrix that considers both stretching and bending terms of the rigid-jointed lattice network.  $(\bar{E}_L)_{xx}$  and  $(\bar{E}_L)_{yy}$  are the homogenized Young modulus computed for the  $x$  and  $y$  directions,  $\bar{G}_L$  is the homogenized shear modulus,  $(v_L)_{xy}$  and  $(v_L)_{yx}$  are the Poisson coefficients for  $xy$  and  $yx$  directions of the lattice material.

#### 1) Square Lattice Material

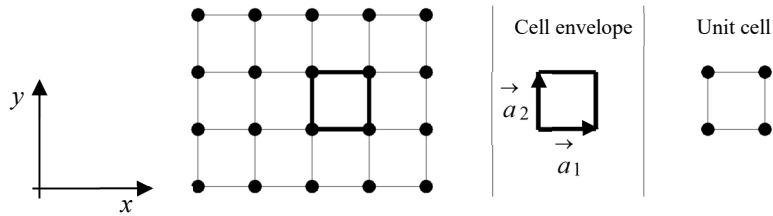

Figure (S1) Microstructure of the 2D square lattice material

$$\bar{K}_L = \frac{K_L}{E} = \bar{\rho}_L \begin{bmatrix} 0.5 & 0 & 0 \\ 0 & 0.5 & 0 \\ 0 & 0 & 0 \end{bmatrix} + (\bar{\rho}_L)^3 \begin{bmatrix} 0 & 0 & 0 \\ 0 & 0 & 0 \\ 0 & 0 & 0.0625 \end{bmatrix}, \bar{\rho}_L = 2 \left( \frac{H}{L} \right)$$
$$(\bar{E}_L)_{xx} = (\bar{E}_L)_{yy} = \frac{1}{2} \bar{\rho}_L, \bar{G}_L = \frac{1}{16} \bar{\rho}_L^3, (v_L)_{xy} = (v_L)_{yx} = 0$$

#### 2) Triangular Lattice Material

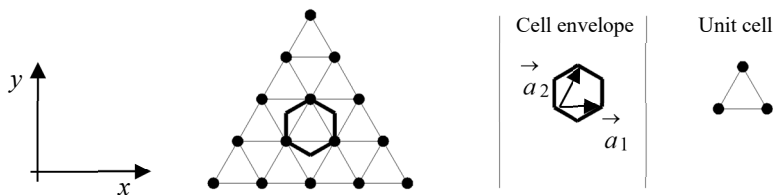

**Figure (S2) Microstructure of the 2D triangular lattice material**

$$\bar{K}_L = \frac{K_L}{E} = \bar{\rho}_L \begin{bmatrix} 0.375 & 0.125 & 0 \\ 0.125 & 0.375 & 0 \\ 0 & 0 & 0.125 \end{bmatrix} + (\bar{\rho}_L)^3 \begin{bmatrix} 0.0052 & -0.0052 & 0 \\ -0.0052 & 0.0052 & 0 \\ 0 & 0 & 0.0006 \end{bmatrix}, \bar{\rho}_L = 3.4641 \left( \frac{H}{L} \right)$$

$$(\bar{E}_L)_{xx} = (\bar{E}_L)_{yy} = \frac{\bar{\rho}_L(625 + 26\bar{\rho}_L^2)}{1875 + 26\bar{\rho}_L^2}, \bar{G}_L = \frac{\bar{\rho}_L(625 + 3\bar{\rho}_L^2)}{5000}, (v_L)_{xy} = (v_L)_{yx} = \frac{625 - 26\bar{\rho}_L^2}{1875 + 26\bar{\rho}_L^2}$$

### 3) Kagome Lattice Material

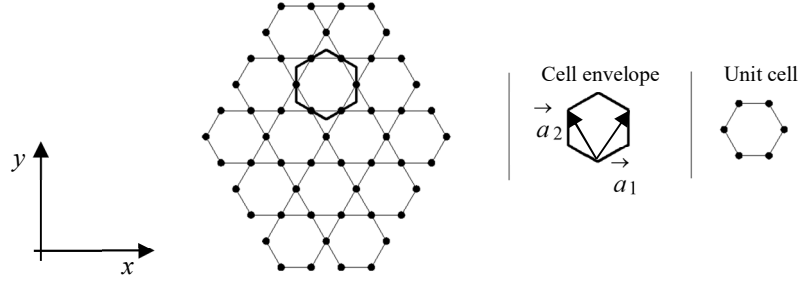

**Figure (S3) Microstructure of the 2D Kagome' lattice material**

$$\bar{K}_L = \frac{K_L}{E} = \bar{\rho}_L \begin{bmatrix} 0.375 & 0.125 & 0 \\ 0.125 & 0.375 & 0 \\ 0 & 0 & 0.125 \end{bmatrix} + (\bar{\rho}_L)^3 \begin{bmatrix} 0.0208 & -0.0208 & 0 \\ -0.0208 & 0.0208 & 0 \\ 0 & 0 & 0.0208 \end{bmatrix}, \bar{\rho}_L = 1.7321 \left( \frac{H}{L} \right)$$

$$(\bar{E}_L)_{xx} = (\bar{E}_L)_{yy} = \frac{\bar{\rho}_L(625 + 104\bar{\rho}_L^2)}{1875 + 104\bar{\rho}_L^2}, \bar{G}_L = \frac{\bar{\rho}_L(625 + 104\bar{\rho}_L^2)}{5000}, (v_L)_{xy} = (v_L)_{yx} = \frac{625 - 104\bar{\rho}_L^2}{1875 + 104\bar{\rho}_L^2}$$

### 4) Lattice Material with Schafli Symbol of 3<sup>3</sup>.4<sup>2</sup>

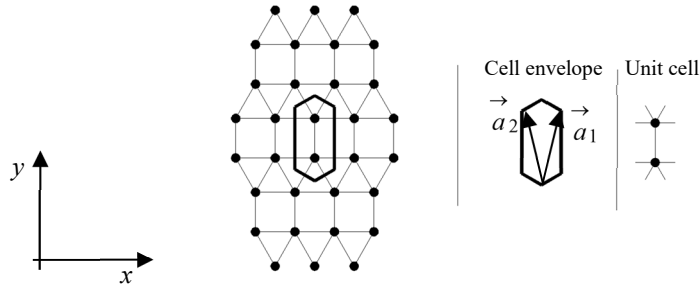

**Figure (S4) Microstructure of the 2D lattice material with Schafli symbol of 3<sup>3</sup>.4<sup>2</sup>**

$$\bar{K}_L = \frac{K_L}{E} = \bar{\rho}_L \begin{bmatrix} 0.41 & 0.0646 & 0 \\ 0.0646 & 0.4178 & 0 \\ 0 & 0 & 0 \end{bmatrix} + (\bar{\rho}_L)^3 \begin{bmatrix} 0 & 0 & 0 \\ 0 & 0 & 0 \\ 0 & 0 & 0.0279 \end{bmatrix}, \bar{\rho}_L = 2.6795 \left( \frac{H}{L} \right)$$

$$(\bar{E}_L)_{xx} = (\bar{E}_L)_{yy} = 0.4\bar{\rho}_L, \bar{G}_L = 0.0279\bar{\rho}_L^2, (v_L)_{xy} = (v_L)_{yx} = 0.156$$

### 5) Lattice Material with Schafli Symbol of 3<sup>4</sup>.6

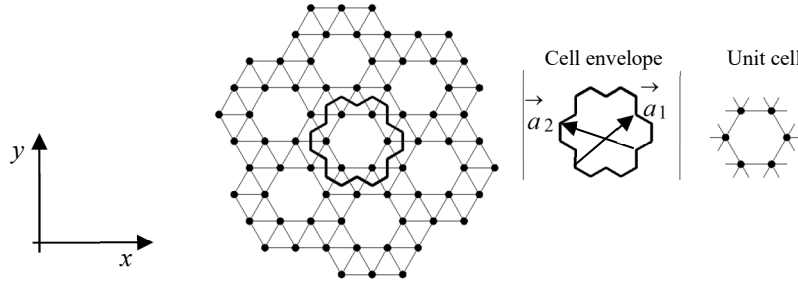

**Figure (S5) Microstructure of the 2D lattice material with Schlafli symbol of  $3^4.6$**

$$\bar{K}_L = \frac{K_L}{E} = \bar{\rho}_L \begin{bmatrix} 0.4445 & 0.2415 & 0 \\ 0.2415 & 0.4445 & 0 \\ 0 & 0 & 0.1015 \end{bmatrix} + (\bar{\rho}_L)^3 \begin{bmatrix} 0.0095 & -0.0095 & -0.0019 \\ -0.0095 & 0.0095 & 0.0019 \\ -0.0019 & 0.0019 & 0.0124 \end{bmatrix}, \bar{\rho}_L = 2.4744 \left( \frac{H}{L} \right)$$

$$(\bar{E}_L)_{xx} = (\bar{E}_L)_{yy} = 1.372 \bar{\rho}_L \left( \frac{90.2 + 19.5 \bar{\rho}_L^2 + \bar{\rho}_L^4}{395 + 56.7 \bar{\rho}_L^2 + \bar{\rho}_L^4} \right), \bar{G}_L = \bar{\rho}_L \left( \frac{20.6 + 4.4 \bar{\rho}_L^2 + 0.228 \bar{\rho}_L^4}{203 + 19 \bar{\rho}_L^2} \right),$$

$$(v_L)_{xy} = (v_L)_{yx} = \left( \frac{214.6 + 17.8 \bar{\rho}_L^2 - \bar{\rho}_L^4}{395 + 56.7 \bar{\rho}_L^2 + \bar{\rho}_L^4} \right)$$

#### 6) Double Hexagonal Triangulation (DHT) Lattice Material

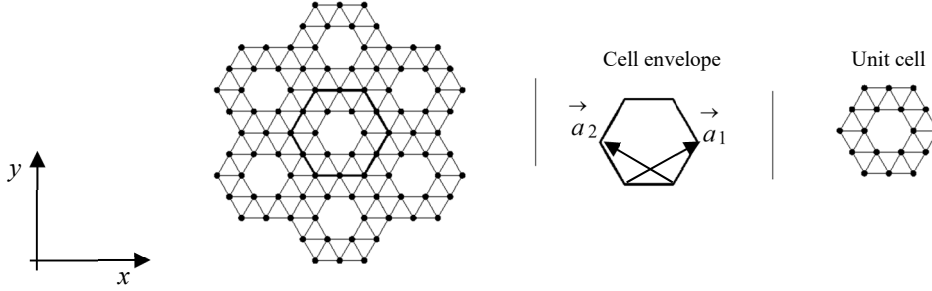

**Figure (S6) Microstructure of the DHT lattice material**

$$\bar{K}_L = \frac{K_L}{E} = \bar{\rho}_L \begin{bmatrix} 0.3431 & 0.1391 & 0 \\ 0.1391 & 0.3431 & 0 \\ 0 & 0 & 0.093 \end{bmatrix} + (\bar{\rho}_L)^3 \begin{bmatrix} 0.0041 & -0.0041 & 0 \\ -0.0041 & 0.0041 & 0 \\ 0 & 0 & 0.004 \end{bmatrix}, \bar{\rho}_L = 2.7905 \left( \frac{H}{L} \right)$$

$$(\bar{E}_L)_{xx} = (\bar{E}_L)_{yy} = 0.964 \bar{\rho}_L \left( \frac{41 \bar{\rho}_L^2 + 1020}{41 \bar{\rho}_L^2 + 3431} \right), \bar{G}_L = \frac{\bar{\rho}_L}{1000} (93 + 4 \bar{\rho}_L^2), (v_L)_{xy} = (v_L)_{yx} = \left( \frac{1391 - 41 \bar{\rho}_L^2}{3431 + 41 \bar{\rho}_L^2} \right)$$

#### 7) Semi-Uni- Braced Square (SUBS) Lattice Material

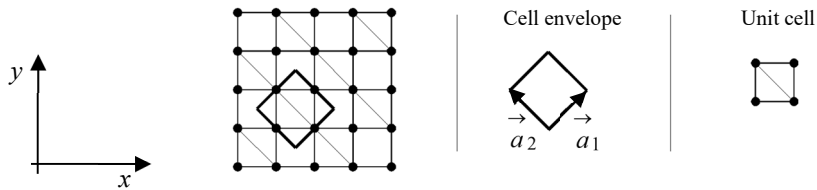

**Figure (S7) Microstructure of the SUBS lattice material**

$$\bar{K}_L = \frac{K_L}{E} = \bar{\rho}_L \begin{bmatrix} 0.4347 & 0.0653 & -0.0653 \\ 0.0653 & 0.4347 & -0.0653 \\ -0.0653 & -0.0653 & 0.0653 \end{bmatrix} + (\bar{\rho}_L)^3 \begin{bmatrix} 0 & 0 & 0 \\ 0 & 0 & 0 \\ 0 & 0 & 0.0126 \end{bmatrix}, \bar{\rho}_L = 2.7071 \left( \frac{H}{L} \right)$$

$$(\bar{E}_L)_{xx} = (\bar{E}_L)_{yy} = 0.3694 \bar{\rho}_L \left( \frac{1.15 \bar{\rho}_L^2 + 4.4}{\bar{\rho}_L^2 + 4.4} \right), \bar{G}_L = \bar{\rho}_L (0.0482 + 0.0126 \bar{\rho}_L^2), (\nu_L)_{xy} = (\nu_L)_{yx} = \left( \frac{\bar{\rho}_L^2}{29.3 + 6.65 \bar{\rho}_L^2} \right)$$

#### 8) Triangular- Triangular (TT) Lattice Material

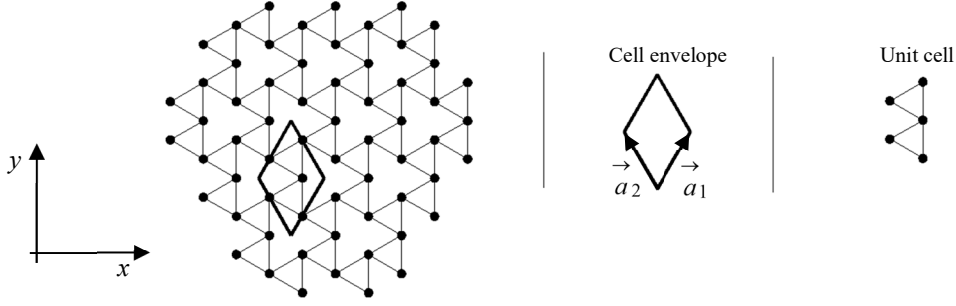

**Figure (S8) Microstructure of the TT lattice material**

$$\bar{K}_L = \frac{K_L}{E} = \bar{\rho}_L \begin{bmatrix} 0.0937 & -0.0937 & 0 \\ -0.0937 & 0.0937 & 0 \\ 0 & 0 & 0.0938 \end{bmatrix} + (\bar{\rho}_L)^3 \begin{bmatrix} 0.0053 & -0.0053 & -0.003 \\ -0.0053 & 0.0053 & 0.003 \\ -0.003 & 0.003 & 0.0018 \end{bmatrix}, \bar{\rho}_L = 2.3094 \left( \frac{H}{L} \right)$$

$$(\bar{E}_L)_{xx} = (\bar{E}_L)_{yy} \approx 0.3956 \bar{\rho}_L, \bar{G}_L = 0.0954 \bar{\rho}_L, (\nu_L)_{xy} = (\nu_L)_{yx} = 1$$

#### 9) Semi-Double Braced Square (SDBS) Lattice Material

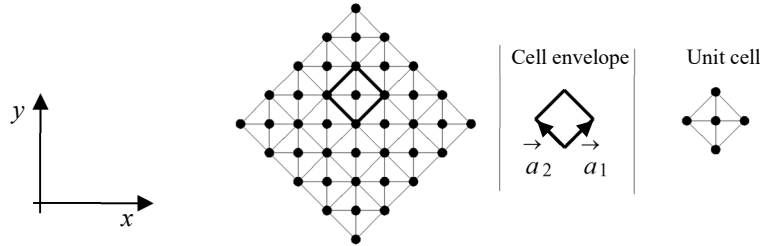

**Figure (S9) Microstructure of the SDBS lattice material**

$$\bar{K}_L = \frac{K_L}{E} = \bar{\rho}_L \begin{bmatrix} 0.3964 & 0.1036 & 0 \\ 0.1036 & 0.3964 & 0 \\ 0 & 0 & 0.1036 \end{bmatrix} + (\bar{\rho}_L)^3 \begin{bmatrix} 0.0022 & -0.0022 & 0 \\ -0.0022 & 0.0022 & 0 \\ 0 & 0 & 0.0063 \end{bmatrix}, \bar{\rho}_L = 3.4142 \left( \frac{H}{L} \right)$$

$$(\bar{E}_L)_{xx} = (\bar{E}_L)_{yy} = \bar{\rho}_L \left( \frac{11 \bar{\rho}_L^2 + 732}{11 \bar{\rho}_L^2 + 1982} \right), \bar{G}_L = \frac{7 \bar{\rho}_L}{10^4} (148 + 9 \bar{\rho}_L^2), (\nu_L)_{xy} = (\nu_L)_{yx} = \left( \frac{518 - 11 \bar{\rho}_L^2}{11 \bar{\rho}_L^2 + 1982} \right)$$

#### 10) Uni- Braced Square (UBS) Lattice Material

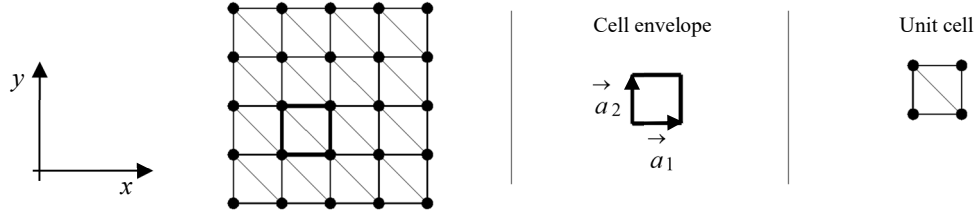

Figure (S-10) Microstructure of the UBS lattice material

$$\bar{K}_L = \frac{K_L}{E} = \bar{\rho}_L \begin{bmatrix} 0.3964 & 0.1036 & -0.1036 \\ 0.1036 & 0.3964 & -0.1036 \\ -0.1036 & -0.1036 & 0.1036 \end{bmatrix} + (\bar{\rho}_L)^3 \begin{bmatrix} 0.0016 & -0.0016 & 0 \\ -0.0016 & 0.0016 & 0 \\ 0 & 0 & 0.0063 \end{bmatrix}, \bar{\rho}_L = 3.4142 \left( \frac{H}{L} \right)$$

$$(\bar{E}_L)_{xx} = (\bar{E}_L)_{yy} = \bar{\rho}_L \left( \frac{881.1 + 101.1\bar{\rho}_L^2 + \bar{\rho}_L^4}{3009.3 + 264.2\bar{\rho}_L^2 + \bar{\rho}_L^4} \right), \bar{G}_L = \bar{\rho}_L (0.06 + 0.0063\bar{\rho}_L^2),$$

$$(v_L)_{xy} = (v_L)_{yx} = \bar{\rho}_L^2 \left( \frac{48.3 - \bar{\rho}_L^2}{3009.3 + 264.2\bar{\rho}_L^2 + \bar{\rho}_L^4} \right)$$

#### 11) Double-Braced Square (DBS) Lattice Material

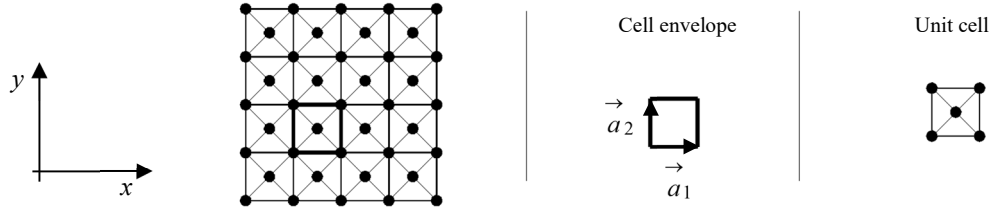

Figure (S11) Microstructure of the DBS lattice material

$$\bar{K}_L = \frac{K_L}{E} = \bar{\rho}_L \begin{bmatrix} 0.3536 & 0.1464 & 0 \\ 0.1464 & 0.3536 & 0 \\ 0 & 0 & 0.1464 \end{bmatrix} + (\bar{\rho}_L)^3 \begin{bmatrix} 0.0063 & -0.0063 & 0 \\ -0.0063 & 0.0063 & 0 \\ 0 & 0 & 0.0022 \end{bmatrix}, \bar{\rho}_L = 4.8284 \left( \frac{H}{L} \right)$$

$$(\bar{E}_L)_{xx} = (\bar{E}_L)_{yy} = 7\bar{\rho}_L \left( \frac{148 + 9\bar{\rho}_L^2}{3536 + 63\bar{\rho}_L^2} \right), \bar{G}_L = \frac{\bar{\rho}_L}{5000} (732 + 11\bar{\rho}_L^2), (v_L)_{xy} = (v_L)_{yx} = 3 \left( \frac{488 - 21\bar{\rho}_L^2}{3536 + 63\bar{\rho}_L^2} \right)$$

#### 12) Patched Kagome' Lattice Material

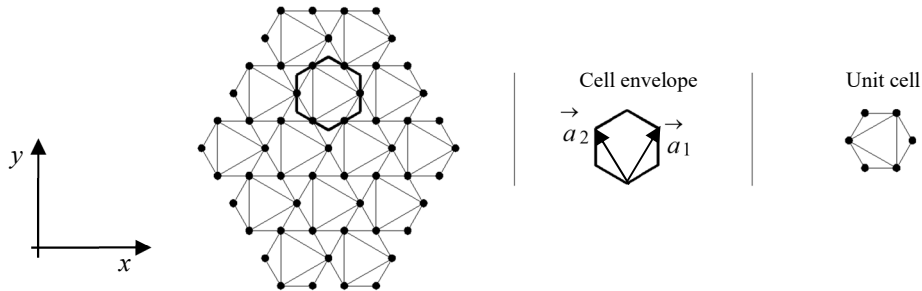

Figure (S12) Microstructure of the patched Kagome' lattice material

$$\bar{K}_L = \frac{K_L}{E} = \bar{\rho}_L \begin{bmatrix} 0.246 & 0.022 & 0 \\ 0.022 & 0.246 & 0 \\ 0 & 0 & 0.112 \end{bmatrix} + (\bar{\rho}_L)^3 \begin{bmatrix} 0.0037 & -0.0037 & -0.0003 \\ -0.0037 & 0.0037 & 0.0003 \\ -0.0003 & 0.0003 & 0.0034 \end{bmatrix}, \bar{\rho}_L = 3.2321 \left( \frac{H}{L} \right)$$

$$(\bar{E}_L)_{xx} = (\bar{E}_L)_{yy} = \bar{\rho}_L \left( \frac{538.3 + 34.1\bar{\rho}_L^2 + \bar{\rho}_L^4}{2206 + 100.1\bar{\rho}_L^2 + \bar{\rho}_L^4} \right), \bar{G}_L = \bar{\rho}_L \left( \frac{125.44 + 7.952\bar{\rho}_L^2 + 0.1249\bar{\rho}_L^4}{1120 + 37\bar{\rho}_L^2} \right),$$

$$(v_L)_{xy} = (v_L)_{yx} = \left( \frac{197.3 - 27.2\bar{\rho}_L^2 - \bar{\rho}_L^4}{2206 + 100.1\bar{\rho}_L^2 + \bar{\rho}_L^4} \right)$$

### 13) Semi-Hexagonal Triangulation (SHT) Lattice Material

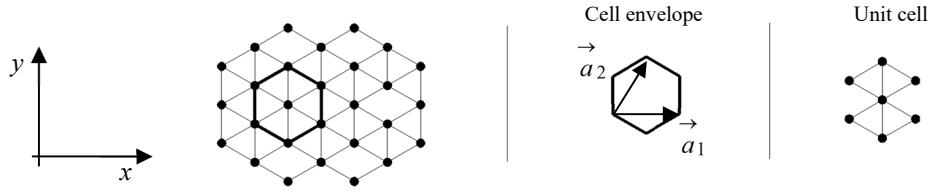

**Figure (S13) Microstructure of the SHT lattice material**

$$\bar{K}_L = \frac{K_L}{E} = \bar{\rho}_L \begin{bmatrix} 0.4219 & 0.1406 & 0 \\ 0.1406 & 0.1969 & 0 \\ 0 & 0 & 0.1406 \end{bmatrix} + (\bar{\rho}_L)^3 \begin{bmatrix} 0.005 & -0.005 & 0.0002 \\ -0.005 & 0.005 & -0.0002 \\ 0.0002 & -0.0002 & 0.013 \end{bmatrix}, \bar{\rho}_L = 3.0792 \left( \frac{H}{L} \right)$$

$$(\bar{E}_L)_{xx} = \bar{\rho}_L \left( \frac{137 + 22.4\bar{\rho}_L^2 + 0.9\bar{\rho}_L^4}{426.2 + 50.2\bar{\rho}_L^2 + \bar{\rho}_L^4} \right), (\bar{E}_L)_{yy} = \bar{\rho}_L \left( \frac{137 + 22.4\bar{\rho}_L^2 + 0.9\bar{\rho}_L^4}{913.1 + 95.254\bar{\rho}_L^2 + \bar{\rho}_L^4} \right),$$

$$\bar{G}_L = \bar{\rho}_L \left( \frac{1.98 + 0.323\bar{\rho}_L^2 + 0.013\bar{\rho}_L^4}{14.06 + \bar{\rho}_L^2} \right), (v_L)_{xy} = \left( \frac{304.3 + 17.3\bar{\rho}_L^2 - \bar{\rho}_L^4}{913.1 + 95.254\bar{\rho}_L^2 + \bar{\rho}_L^4} \right),$$

$$(v_L)_{yx} = \left( \frac{304.3 + 17.3\bar{\rho}_L^2 - \bar{\rho}_L^4}{426.2 + 50.2\bar{\rho}_L^2 + \bar{\rho}_L^4} \right)$$
